# Supplementary material
Source: publisher figshare collection journal article supplement (https://tandf.figshare.com/ndownloader/files/15317003)
Supplement: Supplementary file 1 [file 15317003]

**Supplemental Appendix A**


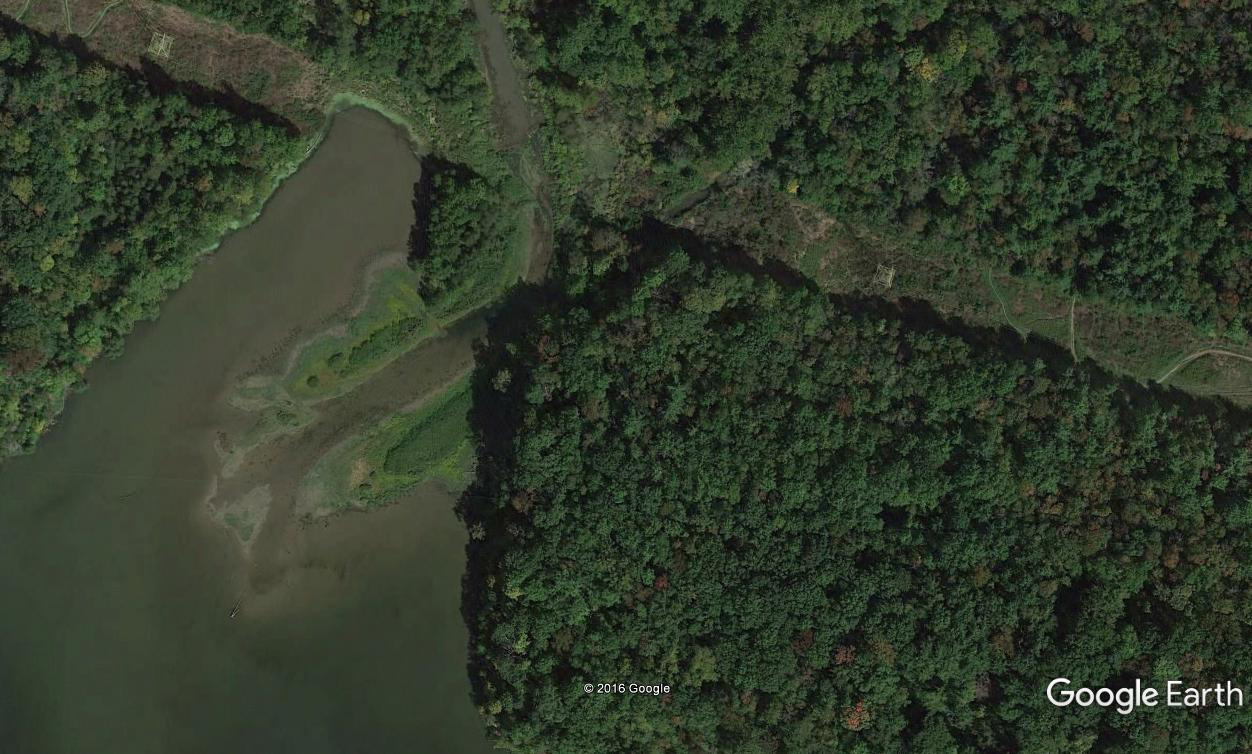

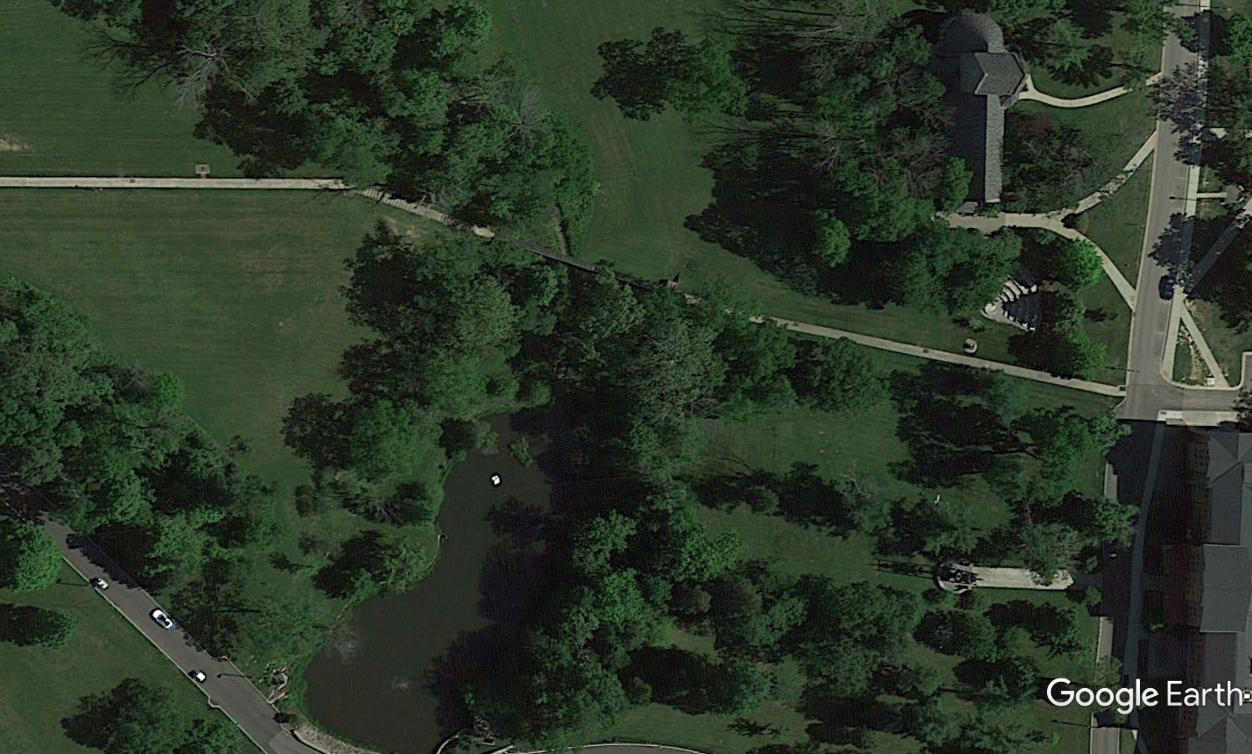


*

**

***

*

**

***

**100 m**

**100 m**

**Supplemental Figure A1: Examples of sampled habitat locations**. Stream (*), Ecotone (**), and Open Water (***) habitats were sampled for adult dragonflies along 100 m transects when available. One of three Acton Lake sites (*left*) and the Western Pond site (*right*) are depicted. Imagery from *Google Earth Pro (2016). Google, Inc. Mountain View, California.*


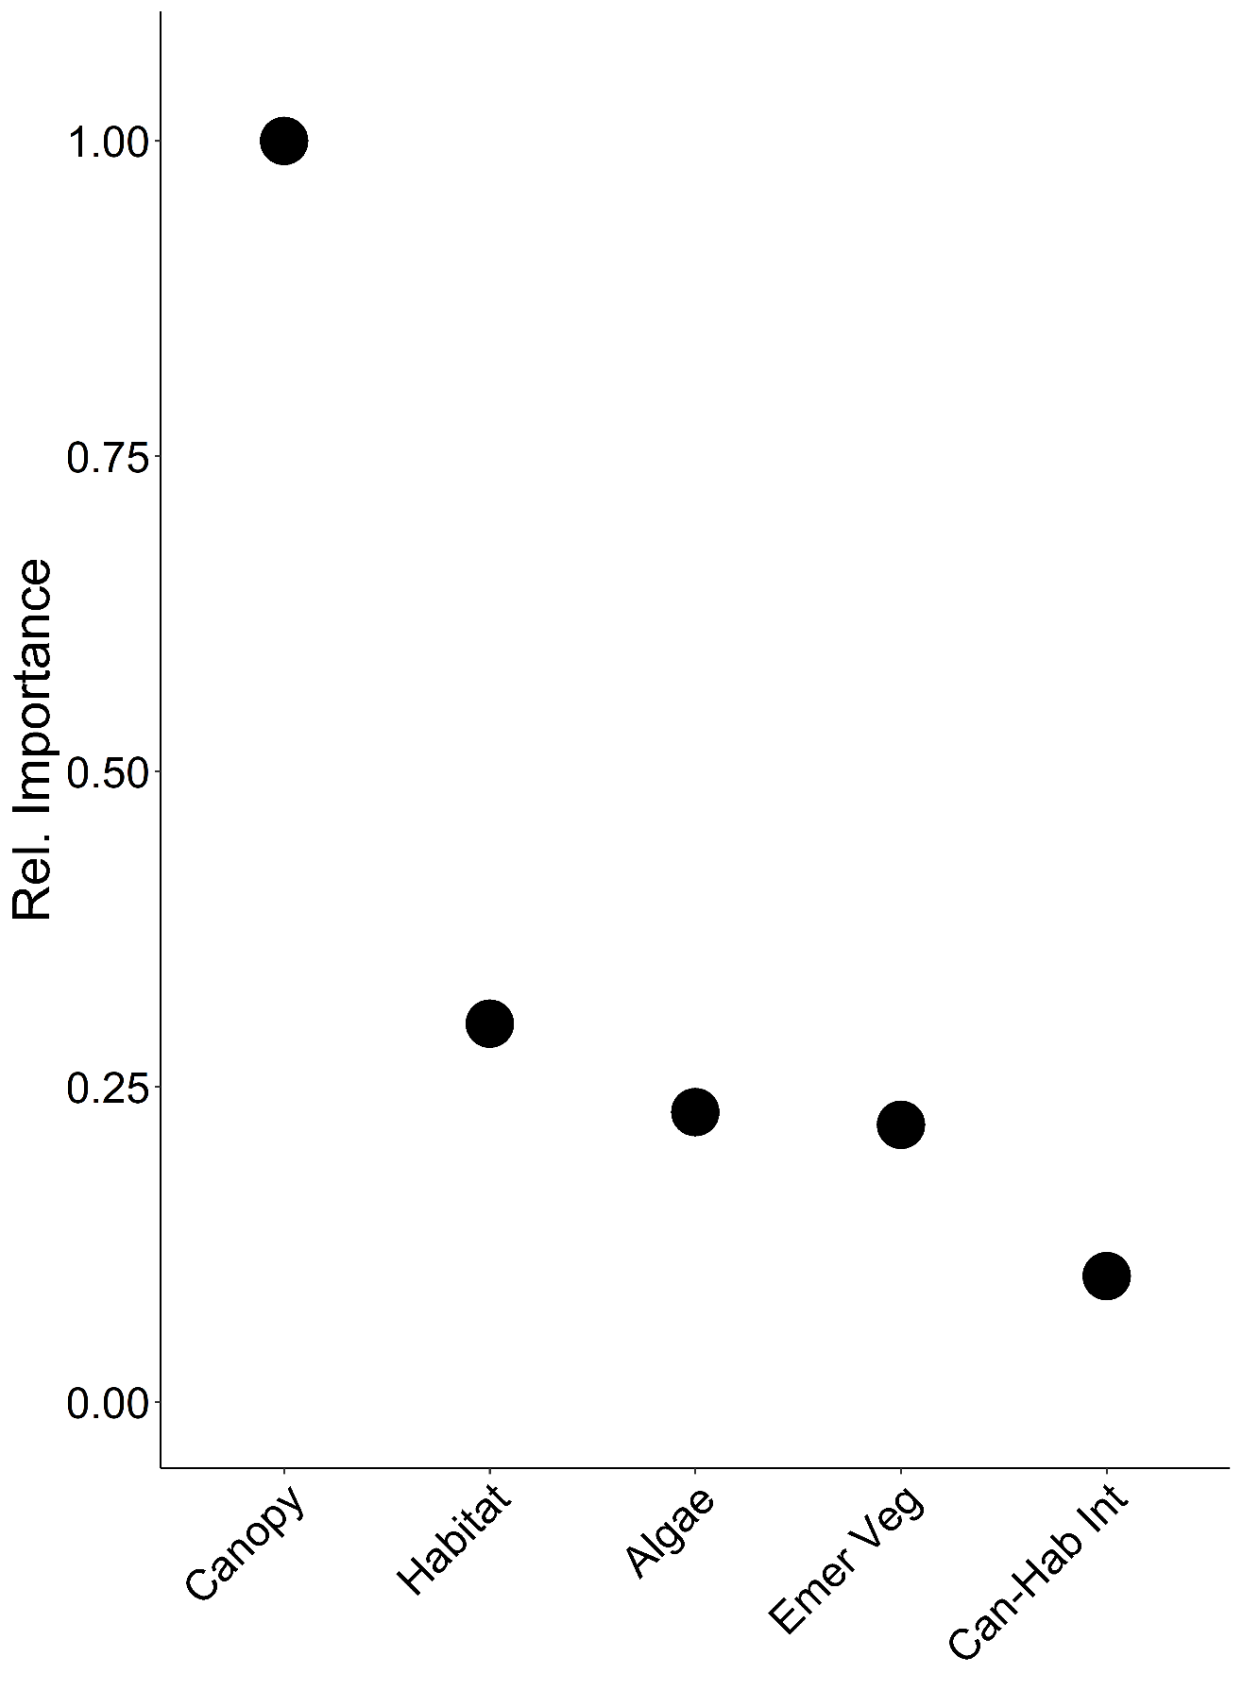


**Supplemental Figure A2: Relative importance of variables explaining dragonfly abundance.** Values based on weights of averaged competing models (n=5) and the appearance of canopy cover, habitat type, algal density, density of emergent vegetation, and interaction between canopy and habitat within models.

**Supplemental Table A1: Mean Coefficient of Conservatism (CoC) by habitat.** Species occurrences during 1 hour (n = 4 samples) of observations along each transect (depicted by “X”) and the associated mean CoC scores used in OIWI analysis. CoC scores extracted from Kutcher and Bried (2013).

| **Habitat:** | **Stream** | | | | **Ecotone** | | | | **Open** | | | | **CoC** | |
| --- | --- | --- | --- | --- | --- | --- | --- | --- | --- | --- | --- | --- | --- | --- |
| **Site:** | **L** | **M** | **S** | **W** | **L** | **M** | **S** | **W** | **L** | **M** | **S** | **W** | **-** |
| *Anax junius* | - | - | - | - | X | X | X | X | - | - | - | - | 5.1 | |
| *Anax longipes* | - | - | - | - | - | - | - | - | X | - | - | - | 8.3 | |
| *Dromogomphus spoliatus* | - | - | - | - | - | - | - | - | - | - | X | - | NA***** | |
| *Epitheca princeps* | - | - | - | - | X | X | X | - | X | X | X | X | 5.8 | |
| *Erythemis simplicicollis* | - | X | X | X | X | X | X | X | X | X | X | X | 5.3 | |
| *Libellula luctuosa* | - | X | X | X | X | X | X | X | X | X | X | X | 4.0 | |
| *Libellula lydia* | - | X | - | X | X | X | X | X | - | X | X | X | 6.0 | |
| *Libellula pulchella* | - | - | - | - | X | - | - | - | X | - | - | - | 4.2 | |
| *Patchydiplax longipennis* | - | - | - | - | X | X | X | X | X | - | - | X | 4.1 | |
| *Pantala flavescens* | - | - | - | - | - | - | - | - | - | X | - | - | 3.1 | |
| *Perithemis tenera* | - | - | - | - | X | X | X | - | X | X | X | X | 3.9 | |
| *Tramea lacerata* | - | - | - | - | X | X | X | - | X | X | - | X | 5.0 | |

*** *Dromogomphus spoliatus* did not receive a CoC score in Kutcher and Bried (2013).**
